# Supplementary material
Source: publisher figshare collection journal article supplement (https://gsajournals.figshare.com/ndownloader/files/24541007)
Supplement: Supplementary file 1 [file 24541007]

NCU04423

DIM-10 protein alignment (Clustal Omega)

Homologs of DIM-10 to align:

>XP_957500.2 Neurospora crassa OR74A

>XP_009849614.1 Neurospora tetrasperma FGSC 2508 (e-value = 0.0)

>KAA8628490.1 Sordaria macrospora (e-value = 0.0)

>VBB84122.1 Podospora comate (e-value = 3.0e-155)

>XP_003709568.1 Magnaporthe oryzae 70-15 (e-value = 3.0e-116)

>SCB64159.1 Fusarium graminearum (e-value = 1.0e-51)

>NP_594986.3 uncharacterized protein SPAC29B12.08/Clr5 [Schizosaccharomyces pombe] (e-value = 8e-5)

>XP_662201.1 Aspergillus nidulans FGSC A4 (e-value = 0.071)

>XP_011391713.1 Ustilago maydis (e-value = 0.11)

CLUSTAL O(1.2.4) multiple sequence alignment

A_nidulans ------------------------------------------------------------ 0

U_maydis ------------------------------------------------------------ 0

S_pombe-Clr5 ------------------------------------------------------------ 0

F_graminearum ------------------------------------------------------------ 0

S_macrospora ----MTQDVPHWRLQEQVPESAAPPAPLSTPTSNPHQNS--------------------- 35

N_crassa MTTSPASDVPHWRLQEQLPESAAPLSPHHEPQAPPTRPTAPAAPDTPPQPDAPRIPLPSS 60

N_tetrasperma MTTSTAPDVPHWRLQEQLPESAAPLSPHHEPQAPPRRPTAPVAPDTPPQPDAPRIPLPA- 59

P_comata ----MKEHFGCFRLATQLHESHLQQPQNQEATAKQTVKSMEAHGQEP------SAAAAAA 50

M_oryzae ------------------------------------------------------------ 0

A_nidulans ------------------------------------------------------------ 0

U_maydis ------------------------------------------------------------ 0

S_pombe-Clr5 ------------------------------------------------------------ 0

F_graminearum ------------------------------------------------------------ 0

S_macrospora ----------------------QAPSPTAKDDHRHLLAAPRGITTTTTTTAIPTATSTSA 73

N_crassa TAAAPTTGSSTSATAIEPPTSNAAPSPTAKADHQH--LPSCT------GPTTATATPRSS 112

N_tetrasperma ----PTTGSSTSATAIEPPTSNAAPSPTAKADHQHLGLPSCT------GPTTSTATSSSS 109

P_comata VSSSPSTGQHE-----NPPA-----------------------------------ESSPV 70

M_oryzae ------------------------------------------------------------ 0

A_nidulans -----------MTSIARGRPSRRSA----------------A------------ARKSYV 21

U_maydis ------------------------------------------------------------ 0

S_pombe-Clr5 ------------------------------------------------------------ 0

F_graminearum ------------------------------------------------------------ 0

S_macrospora VPNSDLFAPSATTNIEQGHDINGTVPDSAPTGGVE---TAKAPSGSIQTGSSTATGASSE 130

N_crassa VSNSNISASSVTANIPQD-PKNGTVP-----GGVD---TA-APGGSF---------HSSE 153

N_tetrasperma VSNSSLSTSSVTANIPQY-PKNGTVP-----GGVD---TA-APGGSF---------HSSE 150

P_comata VPSIQQQTPSR--TTENAVPVVGAQPASSETRSENPFSHPREPGT-V-------NG---- 116

M_oryzae ------------------------------------------------------------ 0

A_nidulans EETSESEDPGNV------TPTPSYPDGDDDGEEEFTPVPQKK---APARASRRRMTSETP 72

U_maydis ------------------------------------------------------------ 0

S_pombe-Clr5 ------------------------------------------------------------ 0

F_graminearum ------------------------------------------------------------ 0

S_macrospora QPTTVTQVPGSSTPTTDGPPPTSTLNGQPPQPQRPPQVPAPSPTSIPDATNSA-ATST-- 187

N_crassa QPTTVTTGAA-RGVTVDG--PPSALNGQPQQSQNPSQVPAPSPIPAPDATNSA-ATST-- 207

N_tetrasperma QPTTATTG-A-RGVTVDG--PPSALNGQPQQSQNPSQVPAPSPIPTPDATNSA-ATST-- 203

P_comata LVASISEAIGRPGSSVNEP-PVVKPDGEEVQTSTTTPAPAPAPAPAPAPAPAP------- 168

M_oryzae ------------------------------------------------------------ 0

A_nidulans KAQAPRRSRRSRTAEPTDTSSVADPSEDGESIASAQDESESASPNTSVKRKSMGHEEPES 132

U_maydis ------------------------------------------------------------ 0

S_pombe-Clr5 ------------------------------------------------------------ 0

F_graminearum ------------------------------------------------------------ 0

S_macrospora STTTPANATLSATDPAT--TTIPSTTTTASARSSFRDPIRWRDPLTVHYDSNSGHAHPAR 245

N_crassa STSTPANATVSATDPAT--TTIPSTTITASARSNFRDPIRWRDPITVHYDSDSGHAHPAR 265

N_tetrasperma STSTPANATLSATDPAT--TTIPSTTITASARSNFRDPIRWRDPITIHYDSDSGHAHPAR 261

P_comata -APAPAPPVLSSAPPPA--APAPAP---------------APAPASVSV----------- 199

M_oryzae ------------------------------------------------------------ 0

A_nidulans PSRTATMKRKSMARKSRVSSTPNPEKSSLPTPEP----------------SLSPEPHPLP 176

U_maydis ------------------------------------------------------------ 0

S_pombe-Clr5 ------------------------------------------------------------ 0

F_graminearum ------------------------------------------------------------ 0

S_macrospora LH----------AQPAHPSSA----SSQLPPPAQLKYEPSRQHQEHPAPQPPS-QSQPPA 290

N_crassa LH----------AQSAHPASASSSSSSQLPPPSQLKYELFRQHIEHHPPSQPATESQLPA 315

N_tetrasperma LH----------AQSAHPASAS--SSSQLPPPSQLKYELSRQHIEHHPASQPATQSQLPA 309

P_comata -P----------AQ----GPAPTGPAPQLPPPQQPSQ---QQHSQPPPPQQPLPLPRPTP 241

M_oryzae ----------------------------------------------------------MA 2

A_nidulans QRDNVPPLADI--------TDSAVNQTPAKPTE-DTKSQFSIVKPNTTILE-KPMDIMLK 226

U_maydis ------------------------------------------------------------ 0

S_pombe-Clr5 ------------------------------------------------------------ 0

F_graminearum MAANAV--------PVAHMENGING----------TKSPAQAAHPYTHSQT-------PV 35

S_macrospora HD----------------------PP--ARPHH--YNQPSYQFHPQPYHT-QPPLQPAPA 323

N_crassa QAQ----LQSL----------GQPAPAQARSHHEPNRCPPSRSHPQTYHTQQPPLQPAPV 361

N_tetrasperma QAQ----SQSS----------AQPAPAQARSHHEPNRCPPSRSHPQTYHT-QPPLQPAPA 354

P_comata AAQNHHPAPSLPSQPLAHPGQAQPPSHQAHPVH------PPQFHPSVRVVS-------PQ 288

M_oryzae STATQHPTGHLGGQPTPIITSDL--PHSYAPST------TATMHPDNVRRF-------TQ 47

A_nidulans S-RTL-GPPKPEEPQGPKSRLMITTLVLNNFKSYAGKQVVGPFHASFSSVVGPN-GSGKS 283

U_maydis ----------------------------------------------------MAVAHRH- 7

S_pombe-Clr5 ------------------------------------------------------------ 0

F_graminearum ----------PLPTYAA-------------PQ--GQ-----APNASPAQSS--------- 56

S_macrospora PVPSTQL-PPP--APSQ-------------PQSYQH-----HLQASQHQHQAPPPAHPQQ 362

N_crassa PVTAIQP-PPP--AHSP-------------RQSYQH-----HLQASPYQYQAPPPAHPQH 400

N_tetrasperma PVTATQL-PPP--AHSP-------------RQSYQY-----HLQASPYQYQAPPPAHPQH 393

P_comata TREQIPPPPPPQPPQSQ-------------PQSQPQ-----HWHRWTAPSHPPPSAHHPP 330

M_oryzae P-ASV-EPPPPRVISAQ-------------PS--GG-----AFHRSPASTAPVTSTYSP- 84

A_nidulans NVIDALLFVFGFRASKMRQGKISALIHNSAN--HPNLPFCEVEVYFQ-EIIDLPGGEH-- 338

U_maydis DGVGQY--GFGQHHLGMAPPPSS-NS----------------FGYDRRPKMENPAE---- 44

S_pombe-Clr5 ------------------------------------------------------------ 0

F_graminearum -----PLISSQQHHSP--PVQPGTLYQ---GH-------------SQPPAMQN------- 86

S_macrospora HYQHSYLLGDPRHHPP--PPPSQQQYHPH----EPRYTSRNDGLISKPIIMDPPRSRPVS 416

N_crassa HYQHSYPVGAPQHHPP--PPPSQQQHHPY----EYQYPSRNDGLISRPIIMDPPRSRPVS 454

N_tetrasperma HYQHSYPVGAPLHHPP--PPPSQQQHHPY----EHPYSSRNDGLISRPIIMDPPRSRPVS 447

P_comata AVHHA--HQQPQHHHQ-------PQPHHYPQHTLPSQPLPRRSMTDRPVIMDPPARRTSH 381

M_oryzae -----------------------AQSQP-----SPSAGLPG-RPRNRPSIMDPPGNKIS- 114

A_nidulans ------EVV-------PDSQL------------------------IISRKAFKNNTS--- 358

U_maydis -----------PVWPVPRIQHQPQQGNAIDRTRDSGGFANSFSQPELTRQ---------- 83

S_pombe-Clr5 ---------------------------------------------------MTKEWECRR 9

F_graminearum ---GNVAPIPLRGHLSPSAQGNPQQTESAGTYQTL-VALIDRAPASVVRHVIRDKWEKSL 142

S_macrospora QPPPQAEPVPSSGFPSPVTTHAHLNKKFADDCTRL-TYAIQQSTPDAVRRVFRDNWEKCM 475

N_crassa QLPPPAEPISSSGFPSPATTHAHLNKKFADDCTRL-TYAIQQSTPEAVRRVVRDNWEKCM 513

N_tetrasperma QLPPPAEPISSSGFPSPATTHAHLNKKFADDCTRL-TYAIQQSTPEAVRRVVRDNWEKCM 506

P_comata M-----PAQTSGGFPSPTLDHASANPKFVDDCTRM-TYAIQQSLPEAVRRIVRDQWEKCL 435

M_oryzae N-----PTMRGGGYPSPTMDHATINPKFVDDVARI-TYAIQQSLGDAVRRAIRDNWEKCL 168

A_nidulans -----------------------KYYMNGKETN----FTAVTTLLRDRGIDLDHKRFLIL 391

U_maydis ----------------Q--GHTANYTYDGSSSALRNPVVYSQPAQAPWGMAAHSSADYAE 125

S_pombe-Clr5 EQIIELSKINGMTIRELQARMSKMYKFDAS-------IRSYKRVLARWGIRVHRQRFVSP 62

F_graminearum ----------------MGSQYHIAFLLNAT-------MHQASPETVGNAVKEFGADFVQK 179

S_macrospora ----------------LGTEFHQAFILNAS-------IHHAVPSITRRAVRDFGQKMVLE 512

N_crassa ----------------LGTEFHQAFILNAA-------IHHAVPSITRRAVRDFGQKMVLE 550

N_tetrasperma ----------------LGTEFHQAFILNAS-------IHHAVPSITRRAVRDFGQKMVLE 543

P_comata ----------------LGTEFHQAFILNAS-------IHHAVPSITQRAVRDFGAKMVAD 472

M_oryzae ----------------LGTDFHQAFVLNAS-------IHHATVPMTKRAIRDFGSKMVKA 205

: :. . .:

A_nidulans QGEVESIAQMKPKAANEHEDGLLEYLEDIIGTSKYKQPIEEAATELEALNDVCVEKNNRV 451

U_maydis YPTASFMAPMGQRAQP-------------------------------------------- 141

S_pombe-Clr5 -RTEEAAART---ASG-------------------------------------------- 74

F_graminearum -AKHELVGHL---SST-------------------------------------------- 191

S_macrospora -SKHELISHF---STA-------------------------------------------- 524

N_crassa -SKHELISHF---STA-------------------------------------------- 562

N_tetrasperma -SKHELISHF---STA-------------------------------------------- 555

P_comata -SIVDIMNHF---TTA-------------------------------------------- 484

M_oryzae -GKADLLEHF---SQA-------------------------------------------- 217

. :

A_nidulans QHVEKEKNALVDKKDKALAYLRDENELAQKQSALYQIYIDECADNLRVTEEAILQMQELL 511

U_maydis ---------PMH------------S-PAPYVGSANGAYGDSAFA---------------- 163

S_pombe-Clr5 ---------DVS------------KALDELVTQLFHA---RQSDKDS------------- 97

F_graminearum ---------DID------------ELADSLISRASPDFLDRVL-ARR------------- 216

S_macrospora ---------DLD------------DVSDAIINKASDAFLDKCL-NAR------------- 549

N_crassa ---------DLD------------DIADAIINKASEAFLDKCL-NAR------------- 587

N_tetrasperma ---------DLD------------DIADAIINKASEAFLDKCL-NAR------------- 580

P_comata ---------DID------------KVADMIIDKASDNFLDKCL-EKR------------- 509

M_oryzae ---------DLD------------VVSDTILAKASHSFLDKAL-ELR------------- 242

:

A_nidulans NLELEKHEGNESGIKELEKAYKRAMKEYERMEKETQELAKGMAKYDKETVKFEEKKKFLV 571

U_maydis ------------------------------------------------------------ 163

S_pombe-Clr5 ------------------------------------------------------------ 97

F_graminearum ------------------------------------------------------------ 216

S_macrospora ------------------------------------------------------------ 549

N_crassa ------------------------------------------------------------ 587

N_tetrasperma ------------------------------------------------------------ 580

P_comata ------------------------------------------------------------ 509

M_oryzae ------------------------------------------------------------ 242

A_nidulans GKQKKLEKAMTSARLAASECQSLVKRHSEAIENKSKETADYENEV--EHEE---QELTKI 626

U_maydis -----------------SGSDPYS-----------KV-MG-------------GGSAPSM 181

S_pombe-Clr5 --------------LAQIEANFGLKLSKRALHYRRKR-LALKRPPPDSHDSPN-NSIPLM 141

F_graminearum --------------LETISARQLVNAL-----ARAER-LGYN--VRDIVREHDEQVIPSM 254

S_macrospora --------------LLTIEAKPLITAL-----ARAER-LGYN--PADVVEEQHERVMPTT 587

N_crassa --------------LLTIEAKPLITAL-----AKAER-LGYN--PADIVEEQHERVTPTS 625

N_tetrasperma --------------LLTIEAKPLITAL-----AKAER-LGYN--PADIVEEQHERVTPTS 618

P_comata --------------LLTIEAAPLTNAL-----AKAER-LGYE--LGDVIPEQQQGQAHP- 546

M_oryzae --------------LRTIEAKPLVDAL-----SRAER-LGYE--SNDVVEQDNNHQERVI 280

. :

A_nidulans RESLKGKTQGLSDQIAAKQKSLEPWDEKINK-----KQSELAVAQSELDIL-KEKSNAGA 680

U_maydis GGAYE---------HTT----ETLWPLGPTS---LDAFAGMPAPNARLTLTSTA------ 219

S_pombe-Clr5 AN---SCLL-SADNSSS-STTSNPNV--------APPISTLPDPVATISSSSSSHLDMGA 188

F_graminearum HSVLTSSTI-PPGNDTMRVKHYQPRPIPSQQLQQPQPQPPVPQPFAR------------- 300

S_macrospora QA--------------A-------RP---------PP----------------------- 594

N_crassa QA--------------A-------RP---------PP----------------------- 632

N_tetrasperma QA--------------A-------RP---------PP----------------------- 625

P_comata -AAAA------PNGHQA-------HP---------TQ------PAAG------------- 564

M_oryzae PSDSP------PATHSA-------------------A------RPAS------------- 296

A_nidulans VLLEEAQSKITSIEETIARKEEDLQECKTQRSTLEDEVEQLQHDLKKYSMK-----EPDV 735

U_maydis ----DK----NRFKARSSLPPPKQFKCSACDAIFSR-----NHDLKRHARI--------- 257

S_pombe-Clr5 IHPPHH----SSLPPHMGVDPSTMADAHNAHSSLTP----PQSG--YSSMPSLPYLQQPF 238

F_graminearum -APPLK----ASSLDDVPMGPPE-IVSCNCGWPCA-----SEEALNYHKKKNACYKVLPT 349

S_macrospora -------------PPPSQSTHAGRLQCMGCYRIFT-----HQAPYEYHMSRQLCAVPPPT 636

N_crassa -------------PP--QSTYPGRLQCMGCYRVFT-----HQVPYEYHTSRRLCTVRPPA 672

N_tetrasperma -------------PP--QSTYPGRLQCMGCYRVFT-----HQVPYEYHTSRRLCTVRPPA 665

P_comata -YPPA--------PSAPPSSQHPMLQCARCFRTFA-----QTSAFEYHTAYSICTILPPT 610

M_oryzae -YVPTG----GSATRASGTDPKAPWQCTVCYRTFT-----QQSAYDHHMRKQVCTRAPAL 346

.

A_nidulans R-AHVSNARQKAEEAR-ATVASTQNRGSVLTGLMRLKE--SGRIEGFHGRLGNLGTIDEK 791

U_maydis HLAVKPFPCGFCD-------------------------------KAFSRKDALKRH---- 282

S_pombe-Clr5 QIPSQRFSRQQQSHPFPAAQHAVNGQPQALYPFIYQSRNVPMGSTMFASSNQSAAH---- 294

F_graminearum DQAG-RDICVFCG-------------------------------CRFGSNGGILYH---- 373

S_macrospora SVKGFEFSCQHCG-------------------------------EGFTRSDEHQSH---- 661

N_crassa SAKGFEFSCQYCG-------------------------------EGFTRSDEHQTH---- 697

N_tetrasperma SVKGFEFSCQYCG-------------------------------EGFTRSDEHQSH---- 690

P_comata -SAGFKHSCPYCG-------------------------------QGFTELVDLNGH---- 634

M_oryzae -PEGFRYSCAHCG-------------------------------QGFTTTVGLQYH---- 370

*

A_nidulans YDVAISTACPALENMVVDTVEVGQQCIDYLRKNNLGRANFILLDRL-----------PKR 840

U_maydis ---VLVKGCGIGNKKPSDNR-KRAATLSKLENTKSGSSNRAPYDDS-----------PSR 327

S_pombe-Clr5 ---PDGNNALPMDNTHA--------NISYMQSSQSMPVNSYSYDRYTPNQPSYLESKPGN 343

F_graminearum ---EKSEVCGPRTAD-------------------------------------TCQKMMD- 392

S_macrospora ---ERAQTCFHAGP--------------------------------------ASHRGPG- 679

N_crassa ---ERARTCFHPGP--------------------------------------PLARGPG- 715

N_tetrasperma ---ERARTCFHTGP--------------------------------------PLARGPG- 708

P_comata ---LNGRVCGHFDTV-------------------------------------KLPRGPG- 653

M_oryzae ---LNNKVCGDFGLT-------------------------------------PAEQGMN- 389

.

A_nidulans DLNKILTPDNVPRLFDLVKPKDPKFAPAF----YSVMQNTLVARDLDQANRIAYGARRWR 896

U_maydis DFTN-FRD-------------DLHYQGQQQPQGFQGEASS-----------SRSFPGRM- 361

S_pombe-Clr5 HQPSYTSE-------------QPMYSTASVPQQISNGPTAVNGLPMN-----SYTPHSN- 384

F_graminearum -LIEHF--------------------------------RTHGRSAHYRAAHSLMTPR-G- 417

S_macrospora -RPPRAVP-------------QPQPVPSS------VVPLTQ----------VQATPAVT- 708

N_crassa -RPPRAAP-------------VP---------------SSI----------VQATPAVA- 735

N_tetrasperma -RPPRAAP-------------VP---------------SSI----------AQATPAVT- 728

P_comata -RPPRAAP-------------VQHASPVP------IASSAPNGTPN---A-SLSTPARS- 688

M_oryzae -STAVAAA-------------GAMAAVAP------AHTTAPLRTEFYQYP-AASTPQRT- 427

:

A_nidulans VVTLDGQLIDTSGTMSGGGTR--V-A----RGAMSSKQVGDITKEQLVQMESDLEEMERK 949

U_maydis ------DTSWP---------S----TLADGSNPGLNADYAANRG----GTNEERTQSS-- 396

S_pombe-Clr5 ------HLHSP-SPNSNSGPTDSLSAPNSTSSPSMAHANGASFASQYPSLNKSIFPASYS 437

F_graminearum ------RTKAP-STEHHATLA--TPTSSQPSSTPQRDPYAHLTPDKYREFNAIMKTAEE- 467

S_macrospora ------RTVDL--TSAGSTPS--AETPAVSKTPNPADPYGHLTQEQLAMMDADLKEAEK- 757

N_crassa ------RTIDL--TSAGSTPS--AETPAGTKTPNAADPYGHLTEEQLAAMDADLKEAEA- 784

N_tetrasperma ------RTIDL--TSAGSTPS--AETPAGTKTPNAADPYGHLTEEQLAAMDADLKEAEA- 777

P_comata ------QLVN---RALAGTPT---------ASPIPGDPYAHLTPEQFQAMNEELHEAEI- 729

M_oryzae ------ATYGSATPRTAGTPE--TPVDGMGKTIGGSDPYAHLTQSQRESLQEELRQAEI- 478

. : .

A_nidulans YQHFQEKQRRVESALREKTEEIPRAETKIQKIMIEIDSAKRSLADAERRVQELSAAHKPS 1009

U_maydis ------HG-----------TQLPSQ-AGL-ITSYGSQQ-QT---------QP-------- 419

S_pombe-Clr5 SS--AEDG---------QNMQAPAH-AYMQSSIYGVNQEQK---------SE-------- 468

F_graminearum ---------------------------------------------------K-------- 468

S_macrospora ---------------------------------------------------K-------- 758

N_crassa ---------------------------------------------------K-------- 785

N_tetrasperma ---------------------------------------------------K-------- 778

P_comata ---------------------------------------------------K-------- 730

M_oryzae ---------------------------------------------------A-------- 479

A_nidulans KTDASRVKVLEEQIVGLEEQIED----LRSQKGGIEEEIQALQNKIMEVGGVRLRSQKAK 1065

U_maydis --Y-PNFGM------GGEDAFQQ--QQRPQLAGGLVNAFNSPEATS-------------- 454

S_pombe-Clr5 --YPSNLSM------QSSMSIKDPSQLQRIHLYPQHSQYDPNGMTMRDHYSERIEPEA-- 518

F_graminearum --YGGL--M------REA-ALLDE-PERSKRLAGLKNSYNTKQSTTRKKFGIRLRERRTR 516

S_macrospora --FAPR--F------AEAYAIPDE-NERRIKIEGLRNSFGTKQSMIRKKYGVRLRQRRTK 807

N_crassa --FAPR--F------AEAYAIPDE-NERRIKIEGLRNSFGTKQSMIRKKYGVRLRQRRTK 834

N_tetrasperma --FAPR--F------AEAYAIPDE-NERRIKIEGLRNSFGTKQSMIRKKYGVRLRQRRTK 827

P_comata --YRPR--F------AEAEAIPDE-NERRQRVEGLRNSFGTKQSMIRKKYGVRLRERRTK 779

M_oryzae --FADR--F------KAAESIADL-NERRIRIDSLRNGFGTKQSMIRKNYGVRLRERRTK 528

. : : .

A_nidulans VD--GLKEQISLLSEEISNAEVARSKNEK----------------------LIKKHENAR 1101

U_maydis -----------VSSPNDPHAKSALSGNAGL------LTGEGLDSKVE--PKAISRPGSAN 495

S_pombe-Clr5 ---KPSDETLTVRSSRD-----LSVHNVG---TLPVLSAAAATQAAMPHTMGPSAHDSAS 567

F_graminearum EEIEAEENRLFNSRGD-----------AGTP------TN------GTPVPDHEFRP---- 549

S_macrospora AEIQAEEERMGLEKLKK-RQKAEKAAAQQ---------A------AAPASASTG------ 845

N_crassa AEIQAEEERMGLEKLRK-KQKAAAQQAAAAAA-----SA------SV--SAATG------ 874

N_tetrasperma AEIQAEEERMGLEKLRK-KQKAAAQQAAAAAA-----SA------SVSASASTG------ 869

P_comata AEIQAERERLGIKQAEK-DQARASMGPAGKTEDRPVVIS------DVPVPVVPP------ 826

M_oryzae KEIEAERERMGRQHEER-YDRNAL-DDARR--SLTAIHG------GVPRPVGPGRP---- 574

A_nidulans AEAEKELANVAEELQKLNEDVANQANDASGWKEKVDEAQDALESKKAELKTMKAELDEKV 1161

U_maydis LPASAPYNAQQLPVAGSYSLAPMLSPLL------GGPDQ--------------------G 529

S_pombe-Clr5 APSPHMQSQQALPYQYYNPLPAMADP------AQNVPQQLPP--------PIHSHLS--- 610

F_graminearum ------------------------------------------------------------ 549

S_macrospora --------------------AAPPRPTGSGWVAANAPRANA------------------- 866

N_crassa --------------------TALPRPAGSGWVAANAPRANA------------------- 895

N_tetrasperma --------------------TAPPRPAGSGWVAANAPRANA------------------- 890

P_comata -------------------MP--VGPPAAGWVAANTPRPKPG---------AA------- 849

M_oryzae ----------PKAYA-TTPVPVPKPAASNTWSTPNTANDNVP---------VKRELDSDA 614

A_nidulans AELNETRATEIEMRNKLEENQKALAENEKRSRYWQEKLSKLTLQNISDLGEDQQPSEFQT 1221

U_maydis --------LGN-------------FHALKRQQQQ--Q-------------------PFGP 547

S_pombe-Clr5 --------------------------------DD--QHIQYSYPN--T------------ 622

F_graminearum ---------------------------NKRPRTD--DMEASASGVNGNLEP-PQKRVFRA 579

S_macrospora --------VWE-------------EHKAKRRRMD--ASGTYQTPTKSTLSVSEI------ 897

N_crassa --------VWE-------------EHEAKRRRMD--ASGTYQTPTKSTLSVSEI------ 926

N_tetrasperma --------VWE-------------EHEAKRRRMD--ASGTYQTPTKSTLSVSEI------ 921

P_comata --------EEE-------------EHHAKRRRTD--TNGGYQTPYRTGVEDTPTRKVSAS 886

M_oryzae --------SPI-------------EGDLKRRRVD--GEGTNSINNLGSVQQSRTEEVS-P 650

A_nidulans FTKDELAEMNKD-------SL------------KAAIAALE------------EKTQNSS 1250

U_maydis YFGNSAAS---------------------------------------------------- 555

S_pombe-Clr5 FVNRFPQNIHHPSANLLDASA--------------------------------------- 643

F_graminearum EMGGGLSGSQAT-AELTDPTAHLNPPQPRYTPQKPSATK--------------PAWSSKR 624

S_macrospora --GGGLAGA-AATAEVHDPTRP--PPALNYLSANSNGQSDEEDEDESGSGSGSPSTANDE 952

N_crassa --GGGLAGV-AATAETHDPTRP--SPISGHQTASSNGQSEDE--EDSASGSGRSSTANDE 979

N_tetrasperma --GGGLAGV-AATAETHDPTRP--SPISGHQTASSDGQSEDE--EDSGSGSGRSSTANDE 974

P_comata FDGAGGSG-------VQNTGNP--YPALGKTPNHADLAA-------------QAAAATAA 924

M_oryzae FVSSGSKSPQSQDSESQSSGTP--ERQL---------AA-------------ESVAAQQS 686

A_nidulans IDL-----------SVIEEYR--------RRAAEHESRSADLATALAARDSAKSRLDGLR 1291

U_maydis ------------------------------------------------------------ 555

S_pombe-Clr5 -------ALNPVQNPLLMPQQ-NHEHSPLVRSDAALHDHGPLLPVYPDVD---SRFV--- 689

F_graminearum IGV----HVGTQEDPM-----SIDEDDSDTDSDSDSDSDGDIPATLN------------- 662

S_macrospora MDIDRQLGSEPASRPVQTNYNSNHNDDD---DDSDSSDDEDIPSTLPAHV---RQTLTTR 1006

N_crassa MDVDEQPGSGPASRPLQNNHNSNHNDDDDDDDDSDSSDDEDIPSTLPAHV---RQTLATR 1036

N_tetrasperma MDVDEQLGSGPASRPLQNNHNSNHNDDDD--DDSDSSDDEDIPSTLPAHV---RQTLATR 1029

P_comata LNG---QNGNSSKQPI--AID-DGDDD-----SDSSGDDEDIPSTLPAHV---RNSLGAS 970

M_oryzae ANATT-ETTAPAAQPVVNLVD-DDDDDEEESSDESEDDDEGIPAVLPQAV---RQGLSQT 741

A_nidulans SARLNGFMEGFGIISLRLKEMYQMITMGGNAELELVDSLDPFSEGILFSVMPPKKSWKNI 1351

U_maydis ------------------------------------------------------------ 555

S_pombe-Clr5 ------------------------------------------------------------ 689

F_graminearum ------------------------------------------------------------ 662

S_macrospora NA---------------------------------------------------------- 1008

N_crassa NA---------------------------------------------------------- 1038

N_tetrasperma NA---------------------------------------------------------- 1031

P_comata AAGKTGSRAGS---------TAS-MTPG-------------------------------- 988

M_oryzae GRGVTNP----------------------------------------------------- 748

A_nidulans GNLSGGEKTLSSLALVFALHHYKPTPLYVMDEIDAALDFRNVSIVASYIKERTKNAQFVV 1411

U_maydis ------------------------------------------------------------ 555

S_pombe-Clr5 ------------------------------------------------------------ 689

F_graminearum ------------------------------------------------------------ 662

S_macrospora ------------------------------------------------------------ 1008

N_crassa ------------------------------------------------------------ 1038

N_tetrasperma ------------------------------------------------------------ 1031

P_comata ------------------------------------------------------------ 988

M_oryzae ------------------------------------------------------------ 748

A_nidulans ISLRNNMLSVEAPMVQVRQYYKNVVRKTTFIELRMTELQRPQQVREAFKESKQLIKLSMK 1471

U_maydis ------------------------------------------------------------ 555

S_pombe-Clr5 ------------------------------------------------------------ 689

F_graminearum ------------------------------------------------------------ 662

S_macrospora ------------------------------------------------------------ 1008

N_crassa ------------------------------------------------------------ 1038

N_tetrasperma ------------------------------------------------------------ 1031

P_comata ------------------------------------------------------------ 988

M_oryzae ------------------------------------------------------------ 748

A_nidulans TRKNP 1476

U_maydis ----- 555

S_pombe-Clr5 ----- 689

F_graminearum ----- 662

S_macrospora ----- 1008

N_crassa ----- 1038

N_tetrasperma ----- 1031

P_comata ----- 988

M_oryzae ----- 748
